# Supplementary material for: Substitution engineering of lead-free halide perovskites for photocatalytic applications assisted by machine learning
Source: Royal Society of Chemistry journal article supplement (doi:10.1039/d3cp00003f), 2023-01-01
Supplement: d3cp00003f1.pdf [file d3cp00003f1.pdf]

# Substitution Engineering of Lead-Free Halide Perovskites for Photocatalytic Applications Assisted by Machine Learning

Tao Wang <sup>a</sup>, Shuxin Fan <sup>b</sup>, Hao Jin<sup>\*, a</sup>, Yunjin Yu <sup>a</sup>, Yadong Wei <sup>\*, a</sup>

<sup>a</sup> College of Physics and Optoelectronic Engineering, Shenzhen University, Shenzhen 518060,  
China

<sup>b</sup> College of Arts and Sciences, Beijing Normal University, Zhuhai 519087, China

E-mail: [jh@szu.edu.cn](mailto:jh@szu.edu.cn); [ywei@szu.edu.cn](mailto:ywei@szu.edu.cn)

**Gradient boost regression.** GBR is a flexible non-parametric statistical machine learning algorithm.<sup>1,2</sup> The method contains a large number of decision trees that are generated sequentially. The construction of each decision tree requires the information of the previously generated decision tree. Therefore, each decision tree is based on a modified version of the original data set. The final regression algorithm is the weighted sum of these weak regression algorithms obtained by each training, as

$$F_M(x) = \sum_{m=1}^M T(x, \theta_m) \quad (1)$$

where  $m$  is the times of training,  $x$  is the input data, and  $\theta_m$  is the distribution weight vector. The model is trained  $M$  times, and each time it produces a weak regression function  $T$ . The loss function of every weak classifier, is defined as

$$\hat{\theta} = \arg_{\theta_m} \min \sum_{i=1}^N L(y_i F_{m-1}(x_i) + T(x_i, \theta_m)) \quad (2)$$

where  $F_{m-1}(x_i)$  is the current model.

**Generation of features.** We generated 273 features using matminer software package, an open-source toolkit.<sup>3</sup> These features can be divided into the following several categories.<sup>4,5</sup> For details of these features, please refer to Ref 4 and 5.

#### *Effective Coordination Number Features<sup>5</sup>*

Effective coordination number of an atom is defined as:

$$CN_{eff} = \frac{(\sum_n A_n)^2}{\sum_n A_n^2} \quad (3)$$

where  $A_n$  is the area of face  $n$  in its Voronoi cell. The maximum, minimum, mean, and mean absolute deviation in coordination number are calculated as features.

#### *Structural Heterogeneity Features<sup>5</sup>*

These features reflect variation in the shape of local bonding environments. Bond length is defined as the Voronoi-face-area-weighted average of the distance between an atom and each neighbor:

$$l_i = \frac{\sum A_n * \|\vec{r}_n - \vec{r}_i\|_2}{\sum A_n} \quad (4)$$

where  $\vec{r}_i$  are the position vector of an atom i.  $A_n$  and  $\vec{r}_n$  are the area position vector of n<sup>th</sup> neighbor of atom i, respectively

The bond length variance is calculated for describing the distribution in bond lengths between each neighbor of an atom.

$$l_i = \frac{\sum |A_n * \|\vec{r}_n - \vec{r}_i\|_2 - l_i|}{l_i * \sum A_n} \quad (5)$$

The maximum, minimum, mean, and mean absolute deviation of  $l_i$  and  $l_i$  are calculated as features.

The mean absolute deviation of the volume of the Voronoi cell about each atom is also used as a feature.

### *Chemical Ordering Features*

These features are based on Warren-Cowley ordering parameters, which measure how the distribution of atoms on a lattice differs from purely-random.<sup>6</sup>

### *Maximum Packing Efficiency*

The radius of the largest sphere centered on the position of the atom is equal to the distance between the center of the atom and the center of the nearest surface.

### *Local Environment Features<sup>5</sup>*

These features are to describe difference in elemental properties between an atom and each neighbor. The local property difference for each atom is defined as:

$$\delta_p = \frac{\sum_n A_n * |p_n - p_i|}{\sum_n A_n} \quad (6)$$

where  $p_i$  and  $p_n$  are the elemental property of the central atom  $i$  and neighboring atom  $n$ , respectively.  $A_n$  is the area of face of atom  $n$ .

#### *Composition-Based Features<sup>4</sup>*

These features are only dependent on the composition of the atoms, which include: Stoichiometric Features are based on the relative fractions of elements in the structure, no matter what the elements are actually. Elemental Property Features are based on the mean, maximum, minimum, mode, range, and mean absolute deviation of 22 elemental properties. Valence Shell Features are based on the fraction of electrons in the s, p, d, and f shells of the constituent elements. Ionicity Features is about judging whether it can to form a charge-neutral ionic compound at a certain composition. Elemental properties used to compute elemental-property-based features is shown in Table S1. The selected 21 features for ML are shown in **Table S2**.

**Table S1.** (Reproduced from Ref.4) Elemental properties used to compute elemental-property-based attributes. s

|                     |                     |                         |                                     |                                     |
|---------------------|---------------------|-------------------------|-------------------------------------|-------------------------------------|
| Atomic Number       | Mendeleev Number    | Atomic Weight           | Melting Temperature                 | Column                              |
| Row                 | Covalent Radius     | Electronegativity       | s Valence Electrons                 | p Valence Electrons                 |
| d Valence Electrons | f Valence Electrons | Total Valence Electrons | Unfilled s States†                  | Unfilled p States†                  |
| Unfilled d States   | Unfilled f States   | Total Unfilled States   | Specific Volume of 0 K Ground State | Band Gap Energy of 0 K Ground State |

|                                                   |                                           |  |
|---------------------------------------------------|-------------------------------------------|--|
| Magnetic Moment (per atom)<br>of 0 K ground state | Space Group Number of 0 K<br>Ground State |  |
|---------------------------------------------------|-------------------------------------------|--|

**Table S2.** 21 feature names

| No | Feature                                                              | No | Feature                                                           |
|----|----------------------------------------------------------------------|----|-------------------------------------------------------------------|
| 1  | average deviation of column in the periodic table (local difference) | 12 | mean of number of s valence electrons (local difference)          |
| 2  | compound possible                                                    | 13 | average deviation of s valence electrons                          |
| 3  | range of Mendeleev Number (local difference)                         | 14 | average deviation of melting temperature                          |
| 4  | average deviation of space group number (local difference)           | 15 | range local of specific volume of ground state (local difference) |
| 5  | average deviation of Mendeleev Number (local difference)             | 16 | mean of space group number                                        |
| 6  | range of the number of unfilled electrons                            | 17 | average deviation of melting temperature (local difference)       |
| 7  | range of the number of valence electrons (local difference)          | 18 | minimum of Mendeleev Number (local difference)                    |
| 8  | minimum of the number of unfilled electrons                          | 19 | maximum of melting temperature                                    |
| 9  | fraction of d valence electrons                                      | 20 | maximum of the number of unfilled f electrons                     |
| 10 | maximum of the number of unfilled electrons (local difference)       | 21 | minimum of column in the periodic table (local difference)        |
| 11 | mean of atomic weight                                                |    |                                                                   |



In order to analyze the hidden trends within the data, we visualize the relationship between the four important features and the bandgaps, as shown in **Fig. S1**. In **Fig. S1 (b)**, results show the bandgap of the materials that can be ionically bonded vary greatly. As seen from **Fig. S1 (a), (c), and (d)**, no obvious trend is observed. It is worth noting that the three features are related to the local environment of the atoms, which means that different substituted sites have great influences on the bandgaps of the materials.

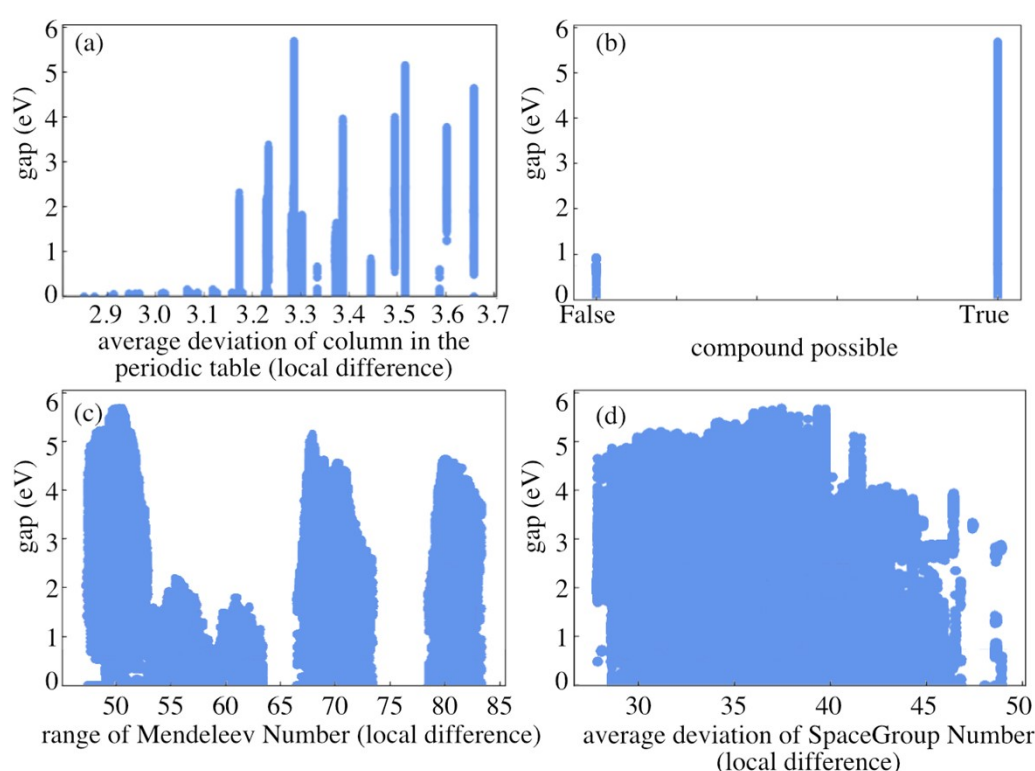

**Figure S1.** Data visualization of predicted bandgaps with (a) average deviation of the columns of the constituent atoms, (b) determining whether a material is ionically bonded, (c) range of the Mendeleev Numbers of the constituent atoms (d) average deviation of the space group number of the elementary substance formed by the constituent atoms.

We select a set of systems with the same concentration as an example and looked at the structures with the smallest ( $\eta_{STH}=13\%$ ), median ( $\eta_{STH}=14\%$ ), and largest ( $\eta_{STH}=15\%$ ) STH efficiency, as shown in **Fig. S2 (a), (b), and (c)** respectively. In this case, the value of  $\eta_{STH}$  is different due to different substituted sites.





(5) Ward, L.; Liu, R.; Krishna, A.; Hegde, V. I.; Agrawal, A.; Choudhary, A.; Wolverton, C. Including Crystal Structure Features in Machine Learning Models of Formation Energies via Voronoi Tessellations. *Phys. Rev. B* **2017**, *96* (2), 024104.

(6) Cowley, J. M. An Approximate Theory of Order in Alloys. *Physical Review* **1950**, *77* (5), 669–675.
